# Supplementary material for: Molecular engineering to red-shift the absorption band of AIE photosensitizers and improve their ROS generation ability
Source: Royal Society of Chemistry journal article supplement (doi:10.1039/d2tb02829h), 2023-01-01
Supplement: d2tb02829h1.pdf [file d2tb02829h1.pdf]

## Supporting Information

### Molecular engineering to red-shift the absorption band of AIE photosensitizers and improve their ROS generation ability

*Yuhui Zhang*<sup>a, b</sup>, *Xiaohong Pan*<sup>a, \*</sup>, *Haixing Shi*<sup>a, b</sup>, *Yaqi Wang*<sup>a, b</sup>, *Wenzhen Liu*<sup>a</sup>,  
*Liangzhi Cai*<sup>c</sup>, *Le Wang*<sup>a, d</sup>, *Huanhuan Wang*<sup>a, d</sup>, *Zhuo Chen*<sup>a, d, \*</sup>

<sup>a</sup> State Key Laboratory of Structural Chemistry, Fujian Institute of Research on the Structure of Matter, Chinese Academy of Sciences, Fujian Academy, University of Chinese Academy of Sciences, Fuzhou, Fujian 350108, China.

<sup>b</sup> Fujian Agriculture and Forestry University Fuzhou, Fujian 350002, China.

<sup>c</sup> Department of Gynecology, Fujian Maternity and Child Health Hospital, College of Clinical Medicine for Obstetrics & Gynecology and Pediatrics, Fujian Medical University, Fuzhou, Fujian, 350001, China.

<sup>d</sup> University of Chinese Academy of Sciences, Beijing 100049, China.

#### **\*Corresponding Authors**

E-mail: [panxiaohong@fjirsm.ac.cn](mailto:panxiaohong@fjirsm.ac.cn) (X. Pan), [zchen@fjirsm.ac.cn](mailto:zchen@fjirsm.ac.cn) (Z. Chen)

## Synthesis and characterization of TTP, TBP, TBCP, and TBQ:

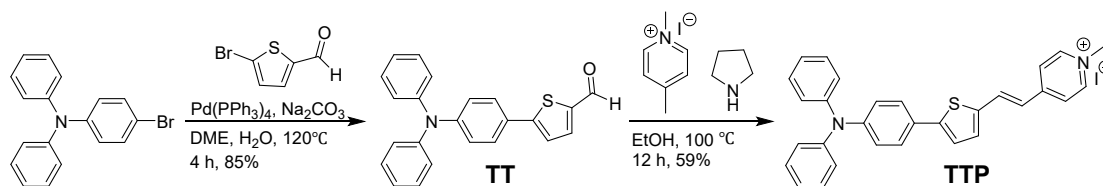

**Synthesis of TT:** A solution of (4-(diphenylamino)phenyl)boronic acid (4.00 g, 13.8 mmol), 5-bromo-2-thiophenecarboxaldehyde (2.40 g, 12.6 mmol), Pd(PPh<sub>3</sub>)<sub>4</sub> (480 mg, 0.416 mmol) and Na<sub>2</sub>CO<sub>3</sub> (2.66 g, 25.1 mmol) in H<sub>2</sub>O (20 mL) and DME (50 mL) was stirred at 120 °C for 4 h. After being cooled to room temperature, the reaction mixture was added water (30 mL), and the resulting mixture was extracted with ethyl acetate. The extracts were combined, washed with H<sub>2</sub>O and brine, dried over Na<sub>2</sub>SO<sub>4</sub> and filtered, the resulting crude product was purified by flash chromatography (silica, ethyl acetate/hexanes = 1/9) to give **TT** (3.74 g, 85%) as a yellow solid: <sup>1</sup>H NMR (400 MHz, CDCl<sub>3</sub>) δ 9.85 (s, 1H), 7.71 (d, *J* = 4.0 Hz, 1H), 7.53 (d, *J* = 8.4 Hz, 2H), 7.32 – 7.26 (m, 5H), 7.15 – 7.05 (m, 8H).

**Synthesis of TTP:** A solution of **TT** (100 mg, 0.28 mmol), 1,4-dimethylpyridin-1-ium iodide (96 mg, 0.42 mmol) and pyrrolidine (2.1 mg, 0.030 mmol) in EtOH (3 mL) was stirred at 100 °C overnight. After being cooled to room temperature, the volatile components of the mixture were removed under reduced pressure, and the resulting crude product was purified by flash chromatography (Al<sub>2</sub>O<sub>3</sub>, MeOH/CH<sub>2</sub>Cl<sub>2</sub> = 1/4) to give **TTP** (95 mg, 59%) as a red solid: <sup>1</sup>H NMR (400 MHz, DMSO-d<sub>6</sub>) δ 8.79 (d, *J* = 6.4 Hz, 2H), 8.20 (d, *J* = 16.0 Hz, 1H), 8.15 (d, *J* = 6.4 Hz, 2H), 7.63 (d, *J* = 8.4 Hz, 2H), 7.51 – 7.48 (m, 2H), 7.37 – 7.33 (m, 5H), 7.13 – 7.06 (m, 6H), 6.98 (d, *J* = 8.8 Hz, 2H), 4.20 (s, 3H); <sup>13</sup>C NMR (100 MHz, DMSO) δ 152.2, 147.8, 147.2, 146.6, 144.8, 138.7, 133.8, 129.8, 126.8, 126.3, 124.8, 124.2, 123.9, 122.9, 122.2, 121.2, 46.8; HRMS (ESI) *m/e* calcd for C<sub>30</sub>H<sub>25</sub>N<sub>2</sub>S (M-I)<sup>+</sup> 445.1733, found 445.1738.

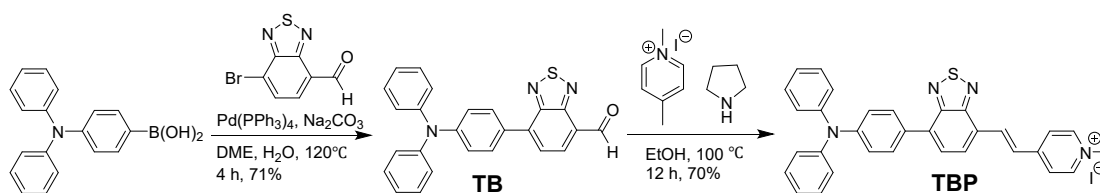

**Synthesis of TB:** A solution of (4-(diphenylamino)phenyl)boronic acid (1.10 g, 3.82 mmol), 7-bromobenzo[c][1,2,5]thiadiazole-4-carbaldehyde (840 mg, 3.46 mmol),  $\text{Pd(PPh}_3)_4$  (120 mg, 0.104 mmol) and  $\text{Na}_2\text{CO}_3$  (872 mg, 10.4 mmol) in  $\text{H}_2\text{O}$  (5 mL) and DME (15 mL) was stirred at  $120^\circ\text{C}$  for 4 h. After being cooled to room temperature, the reaction mixture was added water (10 mL), and the resulting mixture was extracted with ethyl acetate. The extracts were combined, washed with  $\text{H}_2\text{O}$  and brine, dried over  $\text{Na}_2\text{SO}_4$  and filtered. After removal of volatile components from the filtrate, the resulting crude product was purified by flash chromatography (silica, ethyl acetate/hexanes = 1/9) to give **TB** (1.13 g, 71%) as a dark solid:  $^1\text{H}$  NMR (400 MHz,  $\text{CDCl}_3$ )  $\delta$  10.75 (s, 1H), 8.29 (d,  $J$  = 7.2 Hz, 1H), 7.95 (d,  $J$  = 8.8 Hz, 2H), 7.86 (d,  $J$  = 7.6 Hz, 1H), 7.34 (t,  $J$  = 7.6 Hz, 4H), 7.21 (d,  $J$  = 7.6 Hz, 6H), 7.13 (t,  $J$  = 7.2 Hz, 2H).

**Synthesis of TBP:** A solution of **TB** (82 mg, 0.20 mmol), 1,4-dimethylpyridin-1-ium iodide (47 mg, 0.20 mmol) and pyrrolidine (1.4 mg, 0.020 mmol) in EtOH (3 mL) was stirred at  $100^\circ\text{C}$  overnight. After being cooled to room temperature, the volatile components of the mixture were removed under reduced pressure, and the resulting crude product was purified by flash chromatography ( $\text{Al}_2\text{O}_3$ ,  $\text{MeOH/CH}_2\text{Cl}_2$  = 1/9) to give **TBP** (80 mg, 70%) as a red solid:  $^1\text{H}$  NMR (400 MHz,  $\text{DMSO-d}_6$ )  $\delta$  8.91 (d,  $J$  = 5.6 Hz, 2H), 8.38 – 8.34 (m, 3H), 8.14 (d,  $J$  = 6.4 Hz, 1H), 8.04 – 7.99 (m, 3H), 7.40 – 7.36 (m, 5H), 7.14 – 7.09 (m, 8H), 4.28 (s, 3H);  $^{13}\text{C}$  NMR (100 MHz, DMSO)  $\delta$  153.3, 153.1, 152.4, 148.0, 146.7, 145.2, 136.4, 134.3, 132.6, 130.4, 129.8, 129.6, 127.1, 127.0, 126.1, 124.8, 123.9, 123.8, 121.7, 47.0; HRMS (ESI)  $m/e$  calcd for  $\text{C}_{32}\text{H}_{25}\text{N}_4\text{S}$  ( $\text{M-I}$ ) $^+$  497.1794, found 497.1795.

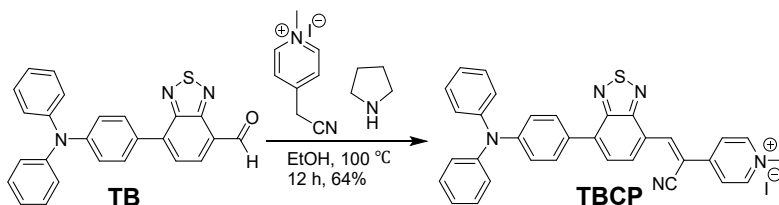

**Synthesis of TBCP:** A solution of **TB** (150 mg, 0.37 mmol), 4-(cyanomethyl)-1-methylpyridin-1-ium iodide (99 mg, 0.38 mmol) and pyrrolidine (2.6 mg, 0.037 mmol) in EtOH (8 mL) was stirred at 100 °C overnight. After being cooled to room temperature, the volatile components of the mixture were removed under reduced pressure, and the resulting crude product was purified by flash chromatography (Al<sub>2</sub>O<sub>3</sub>, MeOH/CH<sub>2</sub>Cl<sub>2</sub> = 1/9) to give **TBCP** (87 mg, 64%) as a dark purple solid: <sup>1</sup>H NMR (400 MHz, DMSO-d<sub>6</sub>) δ 9.17 (s, 1H), 9.08 (d, *J* = 6.8 Hz, 2H), 8.76 (d, *J* = 7.6 Hz, 1H), 8.54 (d, *J* = 7.2 Hz, 2H), 8.18 (d, *J* = 8.0 Hz, 1H), 8.12 (d, *J* = 8.8 Hz, 2H), 7.42 – 7.38 (m, 4H), 7.18 – 7.14 (m, 6H), 7.12 (d, *J* = 8.8 Hz, 2H), 4.38 (s, 3H); <sup>13</sup>C NMR (100 MHz, DMSO) δ 154.2, 152.3, 148.6, 148.4, 146.5, 146.1, 144.7, 136.9, 130.7, 130.5, 129.8, 128.8, 126.6, 125.1, 124.2, 123.5, 123.4, 121.2, 116.1, 107.4, 47.5; HRMS (ESI) *m/e* calcd for C<sub>33</sub>H<sub>24</sub>N<sub>5</sub>S (M-I)<sup>+</sup> 522.1747, found 522.1757.

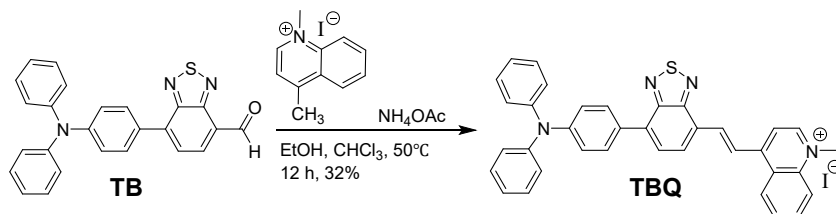

**Synthesis of TBQ:** A solution of **TB** (100 mg, 0.25 mmol), 1,4-dimethylquinolin-1-ium iodide (71 mg, 0.25 mmol) and NH<sub>4</sub>OAc (22 mg, 0.29 mmol) in EtOH/CHCl<sub>3</sub> = 1/4 (5 mL) was stirred at 50 °C overnight. After being cooled to room temperature, the volatile components of the mixture were removed under reduced pressure, and the resulting crude product was purified by flash chromatography (Al<sub>2</sub>O<sub>3</sub>, MeOH/CH<sub>2</sub>Cl<sub>2</sub> = 1/9) to give **TBQ** (53 mg, 32%) as a purple solid: <sup>1</sup>H NMR (400 MHz, DMSO-d<sub>6</sub>) δ 9.43 (d, *J* = 6.4 Hz, 1H), 9.18 (d, *J* = 15.2 Hz, 1H), 8.92 (d, *J* = 8.0 Hz, 1H), 8.64 (d, *J* = 6.8 Hz, 1H), 8.58 (d, *J* = 16.4 Hz, 1H), 8.52 (d, *J* = 8.8 Hz, 1H), 8.39 (d, *J* = 7.2 Hz, 1H), 8.34 (t, *J* = 7.2 Hz, 1H), 8.16 (t, *J* = 8.0 Hz, 1H), 8.08 – 8.04 (m, 3H), 7.41 (t, *J* =

8.0 Hz, 4H), 7.16 – 7.11 (m, 8H), 4.59 (s, 3H);  $^{13}\text{C}$  NMR (100 MHz, DMSO- $d_6$ )  $\delta$  153.3, 153.1, 152.0, 148.3, 148.1, 146.7, 138.7, 137.9, 135.1, 134.5, 132.7, 130.5, 129.8, 129.7, 129.4, 127.0, 126.4, 126.3, 125.7, 124.9, 124.0, 123.3, 121.6, 119.6, 116.4, 44.9; HRMS (ESI)  $m/e$  calcd for  $\text{C}_{36}\text{H}_{27}\text{N}_4\text{S}$  (M-I) $^+$  547.1951, found 547.1960.

**Fluorescence quantum yield measurement:** Fluorescence quantum yields (relative values) of AIE-PSs (10  $\mu\text{M}$ ) in DMSO containing 95% toluene were measured by detecting the fluorescence ( $\lambda_{\text{ex}} = 500$  nm) and calculated according to the following expression:

$$\phi_{fS} = \frac{F_S}{F_R} \times \frac{(1 - 10^{-A_R})}{(1 - 10^{-A_S})} \times \phi_{fR}$$

where the subscripts R and S refer to the reference and the sample, respectively,  $\Phi_f$  is the fluorescence quantum yield, and  $\Phi_{fR}$  is the fluorescence quantum yield of **TTPy** ( $\Phi_f = 0.089$ ) which was measured by a calibrated integrating sphere in DMSO containing 95% toluene,  $F$  is the integrated fluorescence intensity under fluorescence emission spectrum,  $A$  is the value of  $\text{OD}_{500}$ .

**Singlet oxygen ( $^1\text{O}_2$ ) detection and quantum yield measurement:** The  $^1\text{O}_2$  generation was studied using 9,10-anthracenediy-bis(methylene)dimalonic acid (ABDA) as an indicator, as the absorbance of ABDA will decrease upon reaction with  $^1\text{O}_2$ . Typically, a mixture of ABDA (100  $\mu\text{M}$ ) and AIE-PSs (10  $\mu\text{M}$ ) in water with 1% DMSO was exposed to green ( $517 \pm 5$  nm, 9 mW/cm $^2$ ) or red ( $605 \pm 5$  nm, 9 mW/cm $^2$ ) light. The decomposition of ABDA was monitored by recording the absorbance decrease at 378 nm every 5 s.  $^1\text{O}_2$  quantum yields of AIE-PSs were calculated by the equation:

$$\phi_{\Delta\text{AIE-PSs}} = \frac{K_{\text{AIE-PSs}} \times A_{RB}}{K_{RB} \times A_{\text{AIE-PSs}}} \times \phi_{\Delta RB}$$

$\Phi_{\Delta RB}$  is the singlet oxygen quantum yield of Rose Bengal in water ( $\Phi_{\Delta} = 0.75$ ),  $A$  is the value of  $\text{OD}_{517}$ , and  $K$  is the slope of the descent curve of ABDA absorbance decrease.

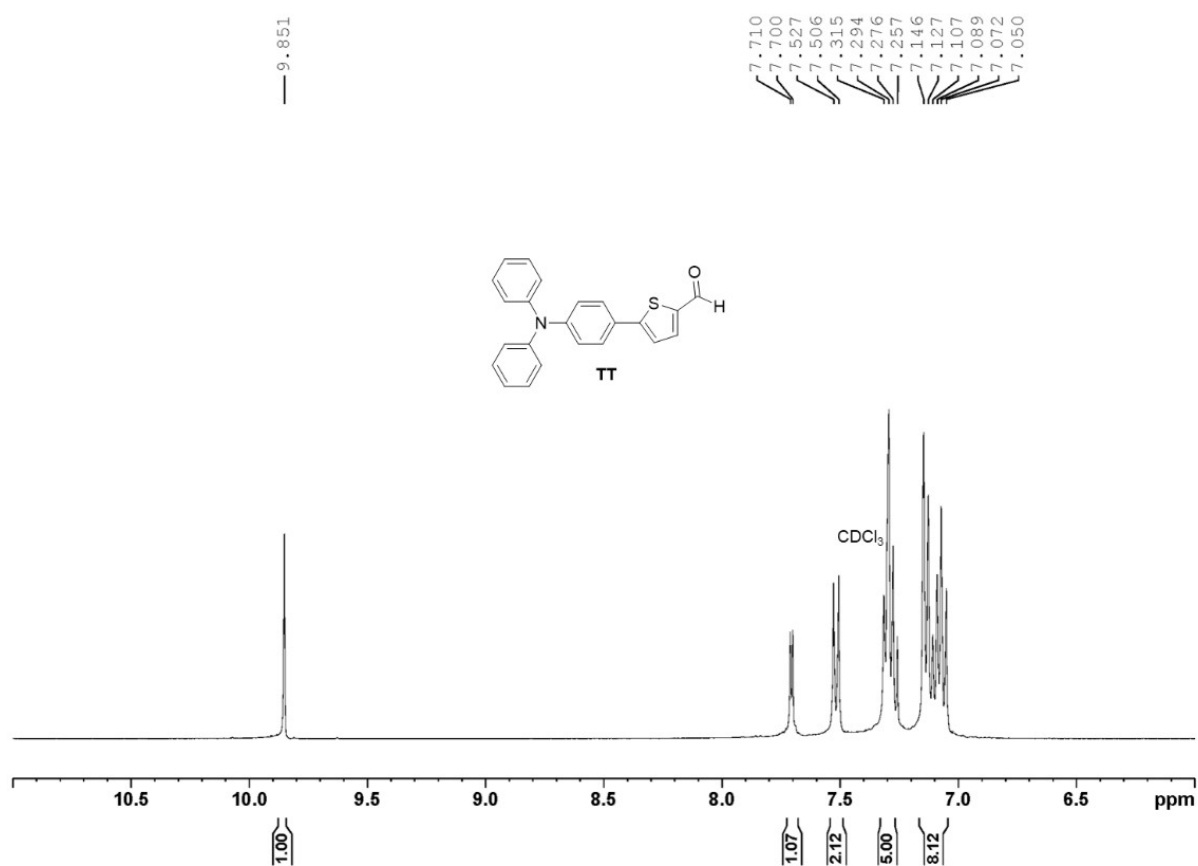

**Figure S1.**  $^1\text{H}$  NMR spectrum of **TT**.

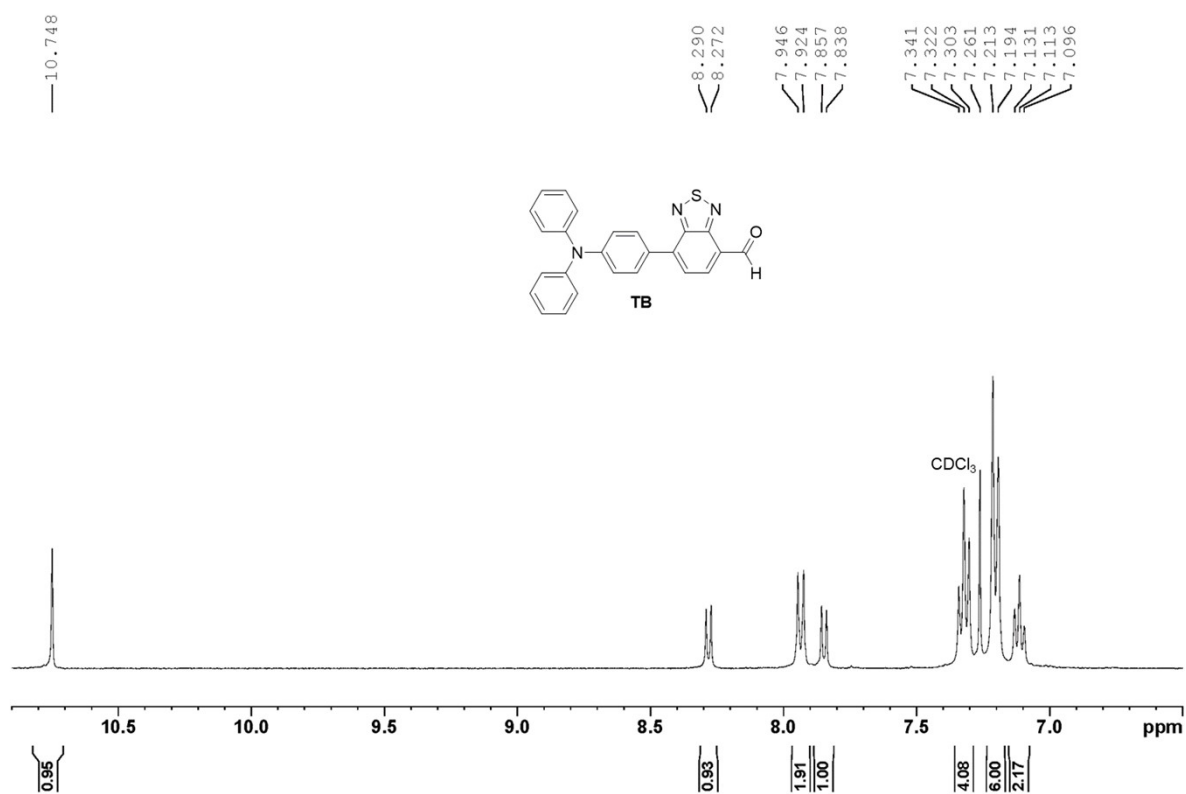

**Figure S2.**  $^1\text{H}$  NMR spectrum of TB.

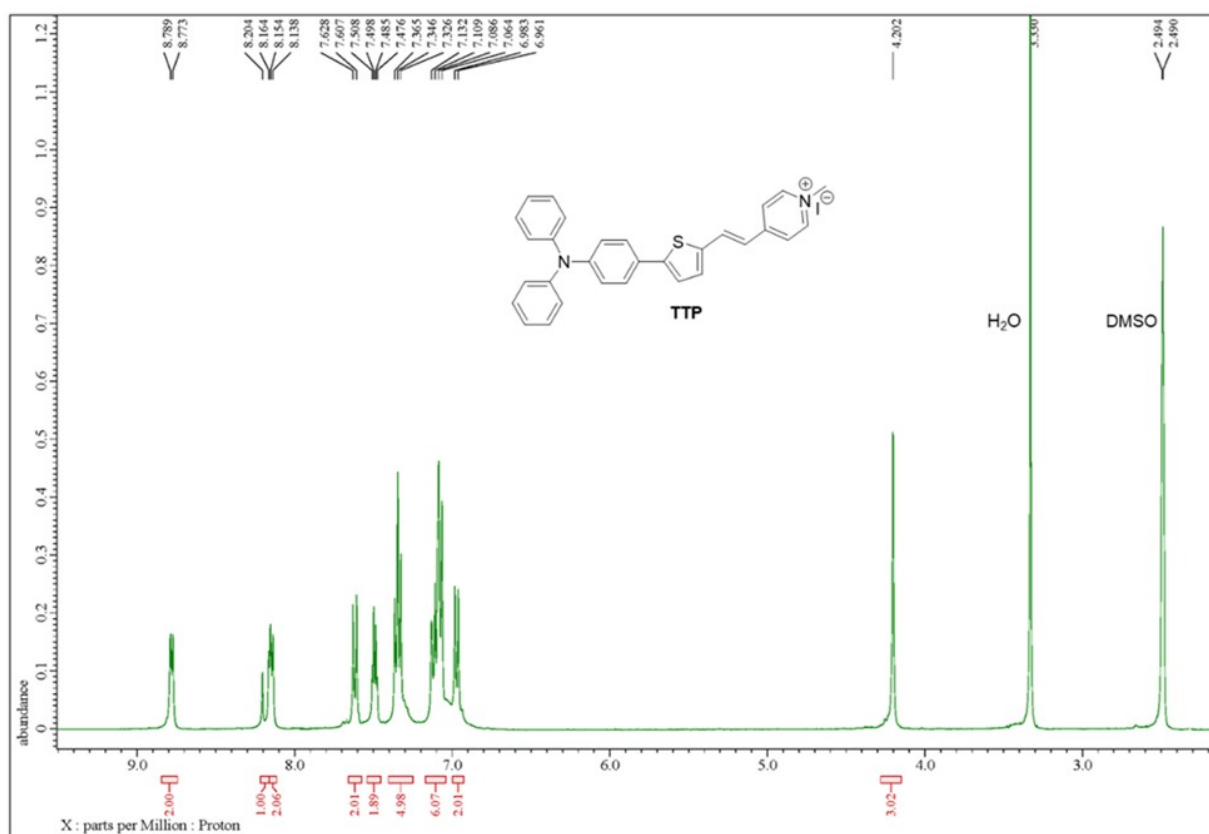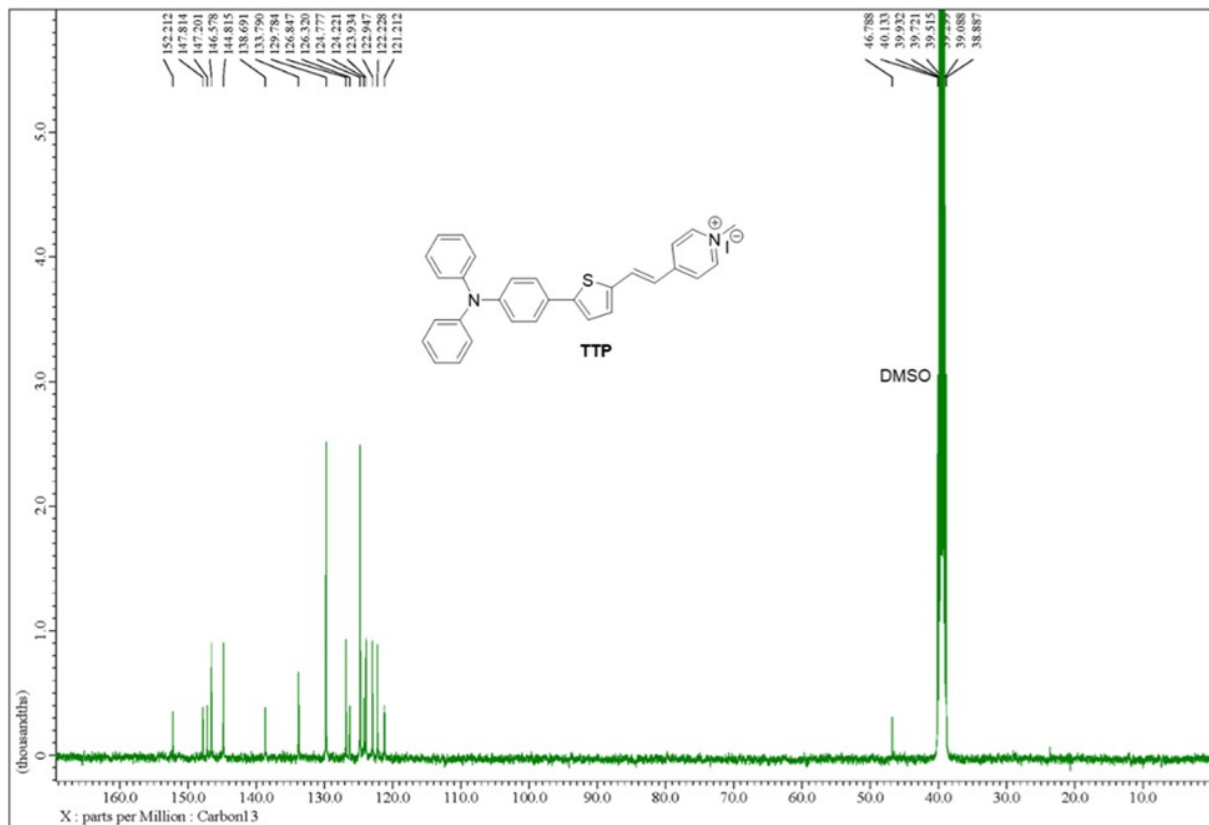

**Figure S3.**  $^1\text{H}$  NMR and  $^{13}\text{C}$  NMR spectra of TTP.

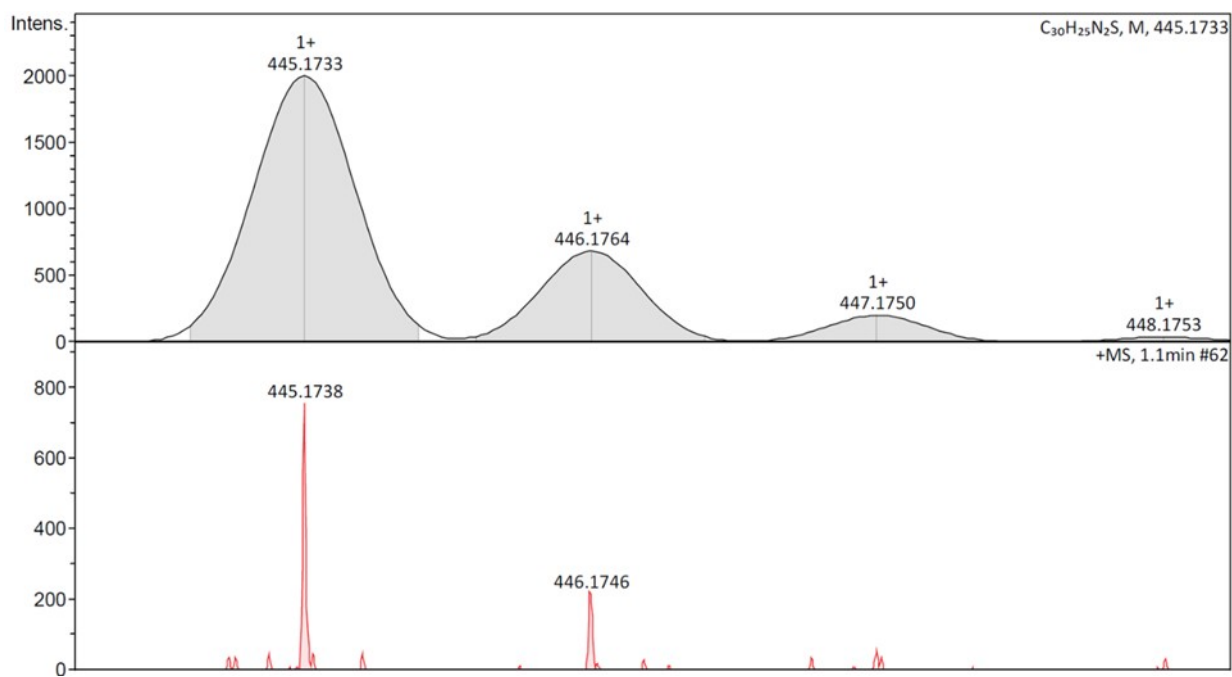

**Figure S4.** HRMS spectrum of TTP.

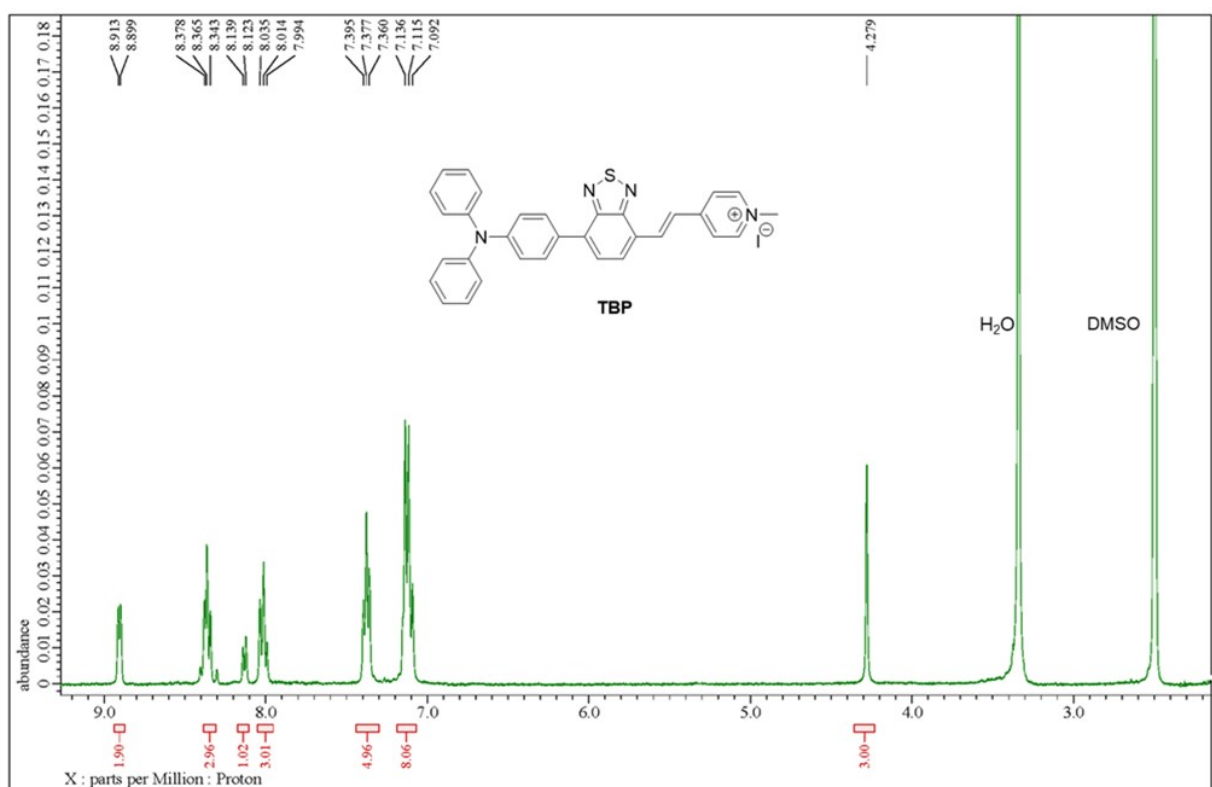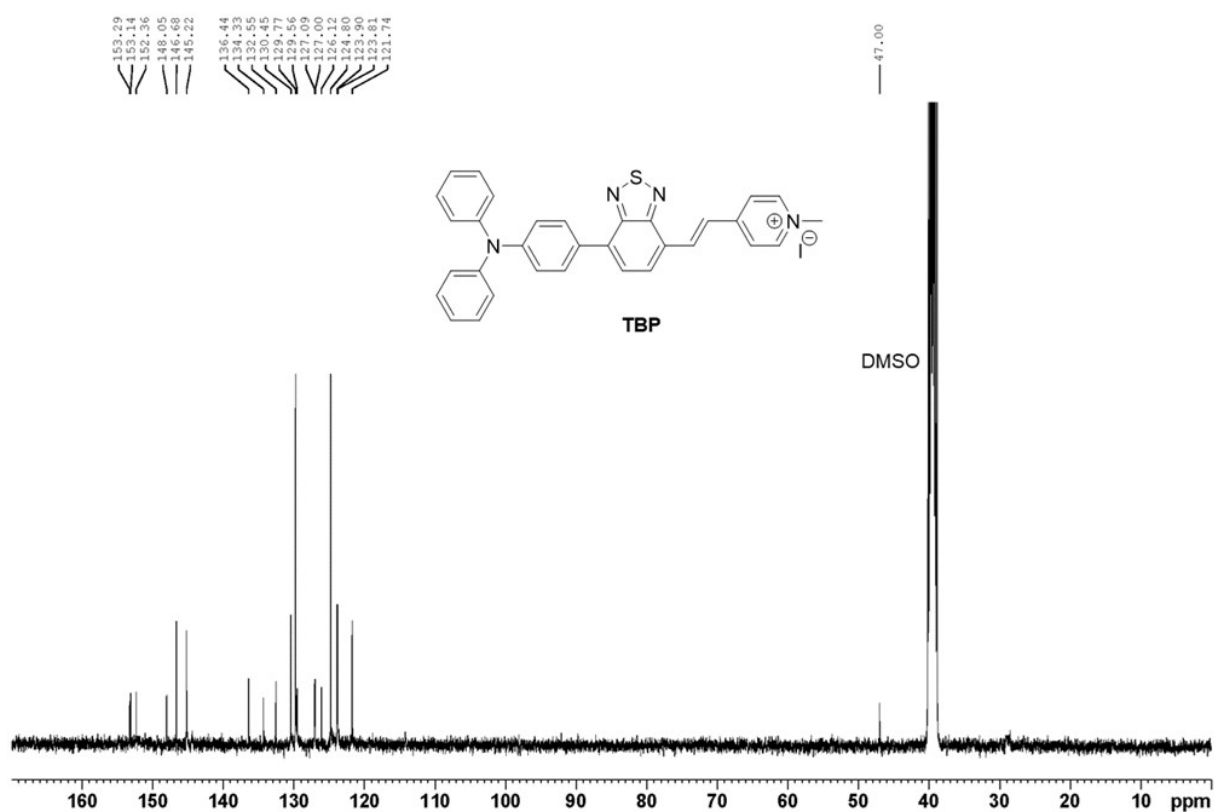

**Figure S5.** <sup>1</sup>H NMR and <sup>13</sup>C NMR spectra of TBP.

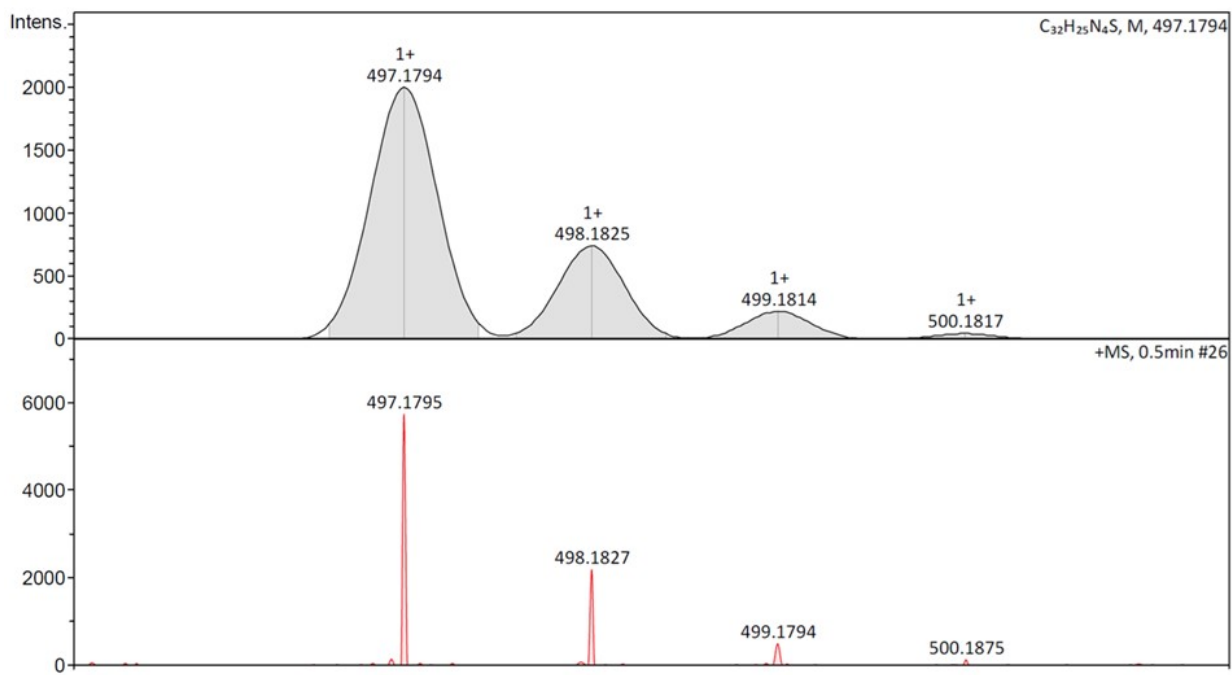

**Figure S6.** HRMS spectrum of TBP.

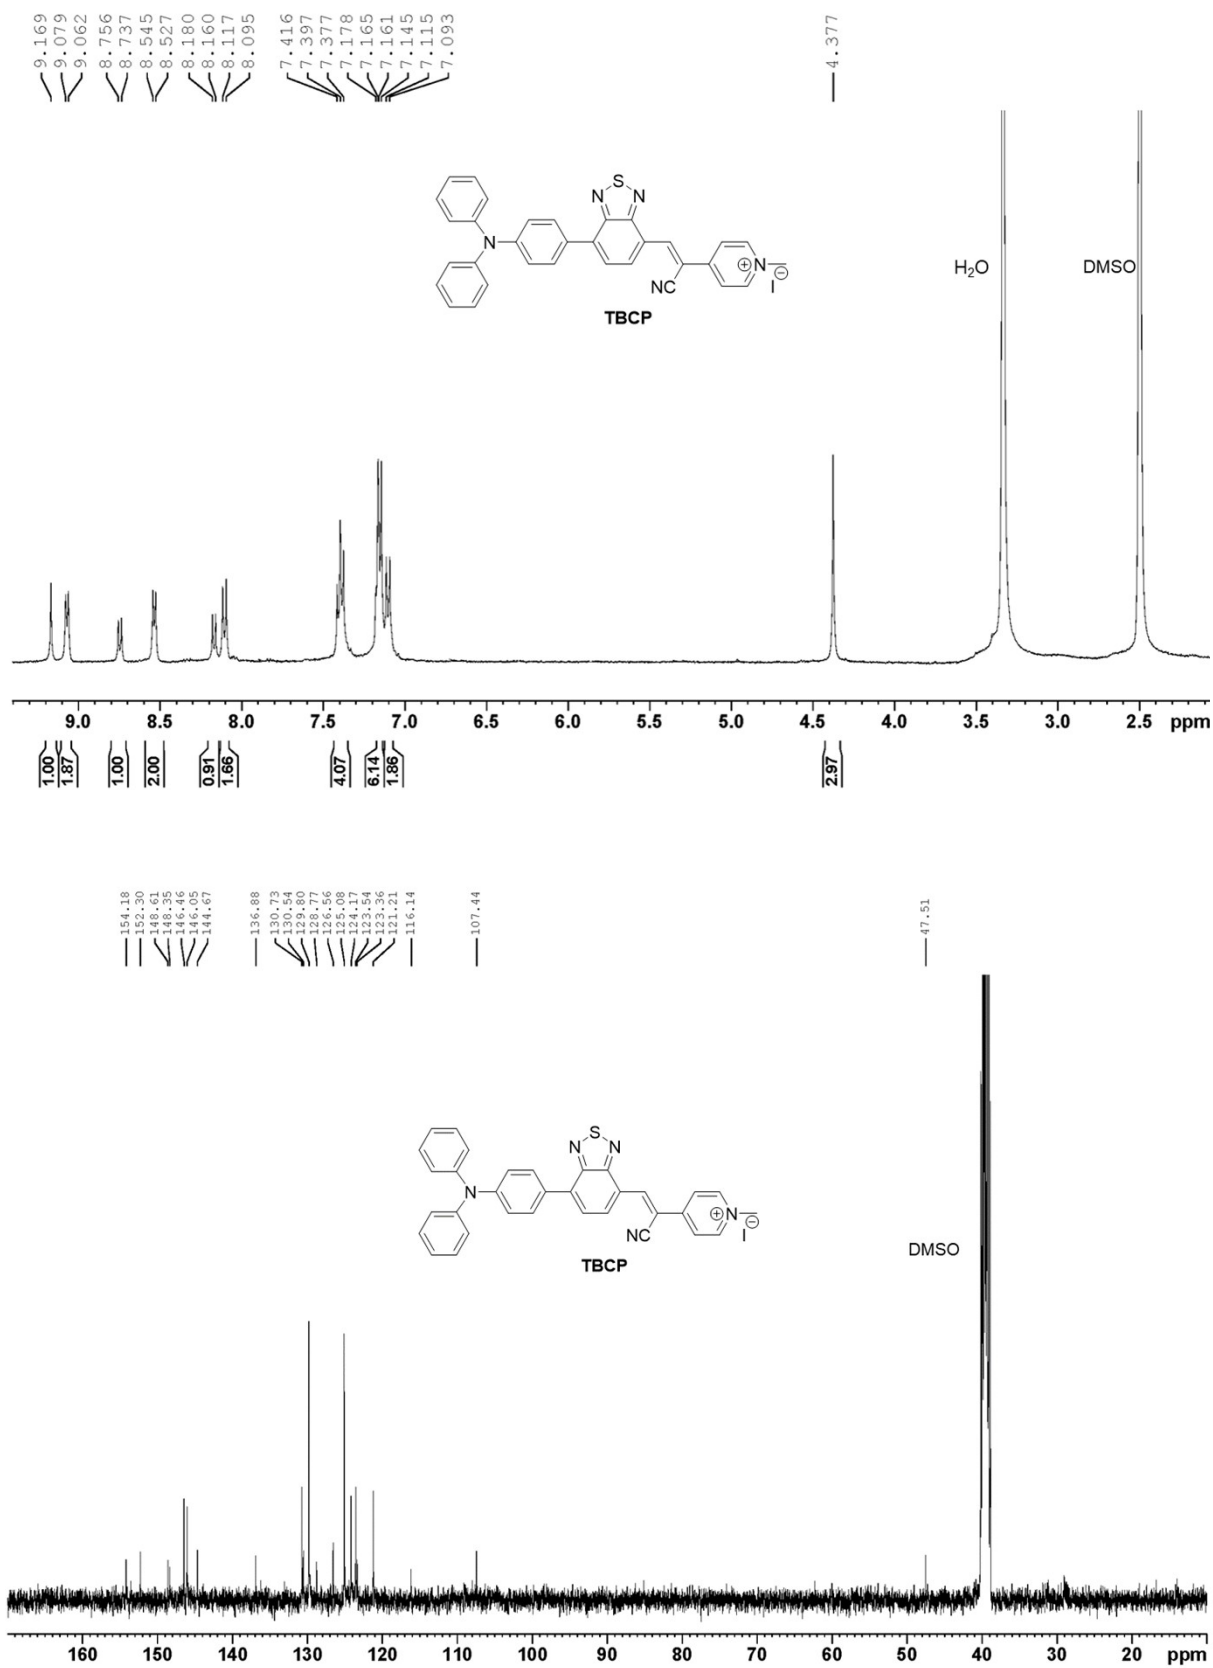

Figure S7. <sup>1</sup>H NMR and <sup>13</sup>C NMR spectra of TBCP.

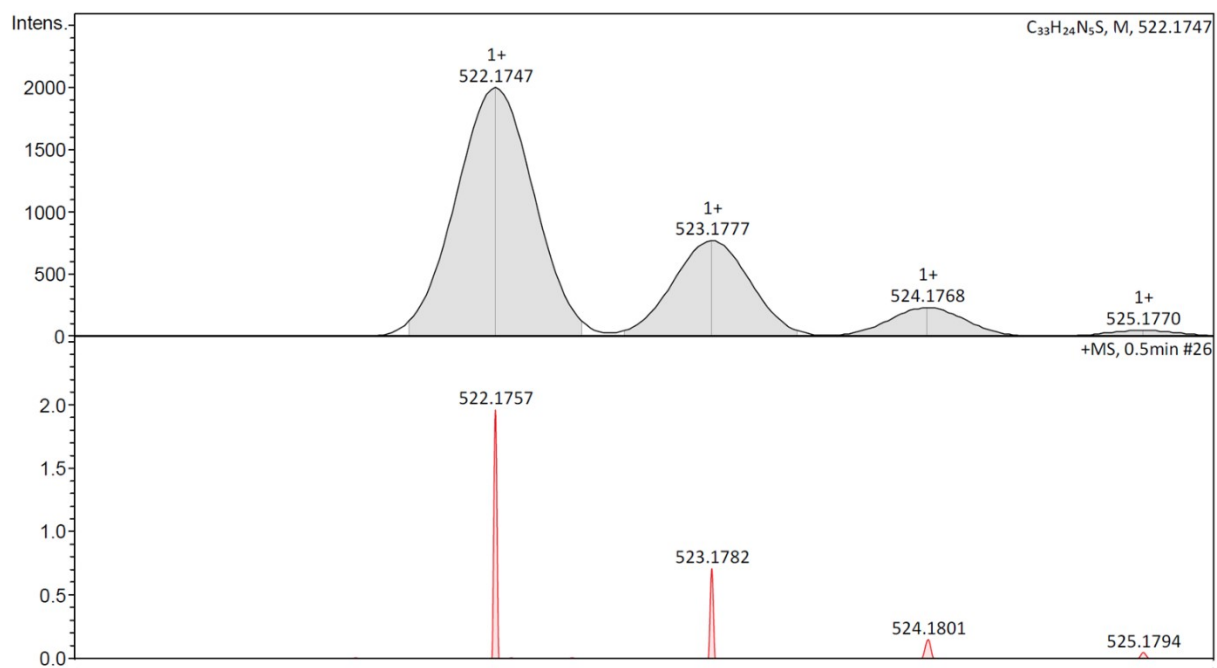

**Figure S8.** HRMS spectrum of **TBCP**.

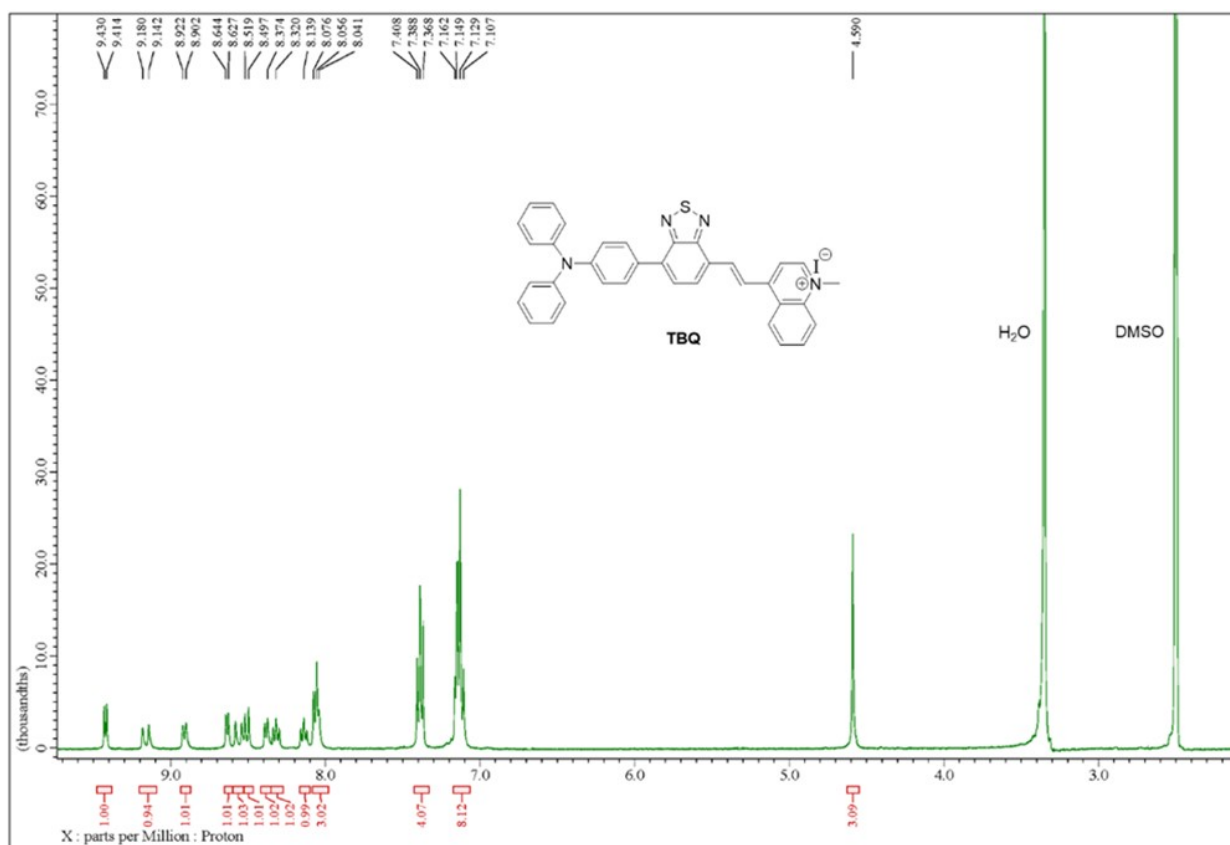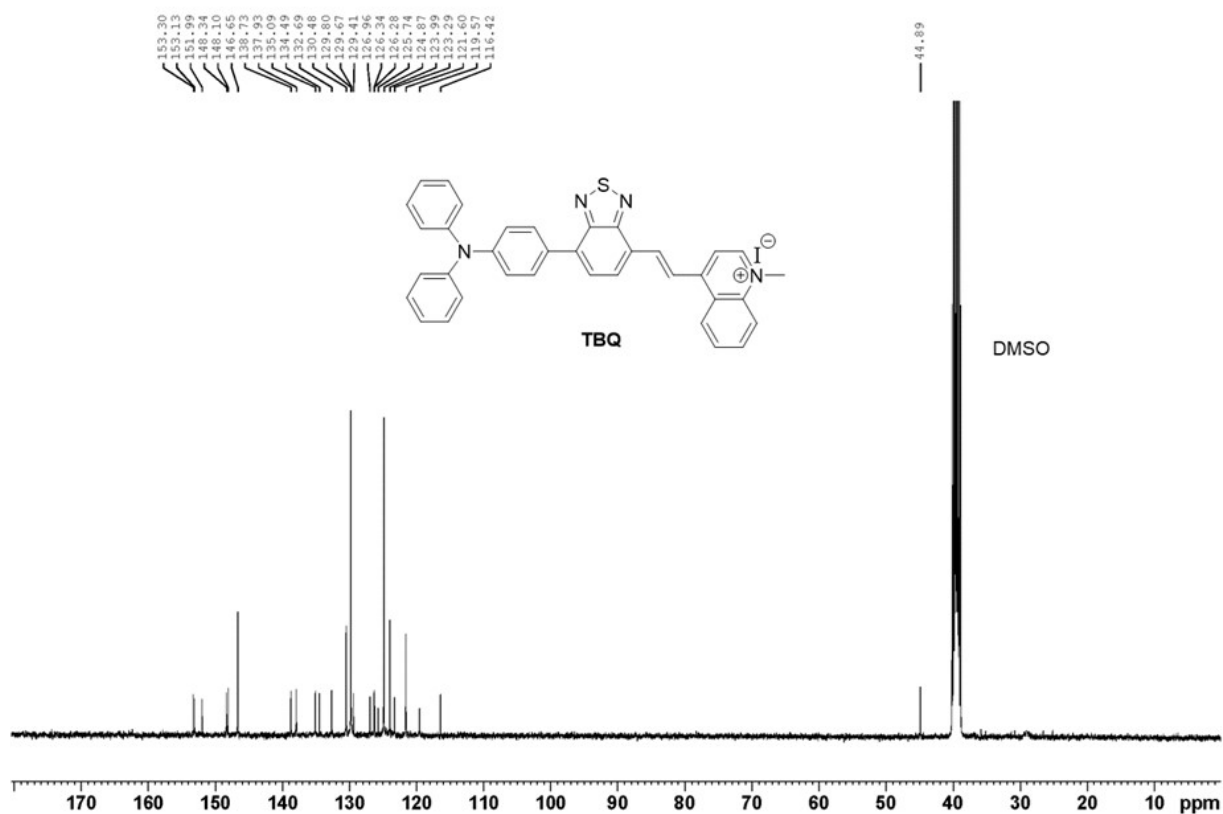

**Figure S9.** <sup>1</sup>H NMR and <sup>13</sup>C NMR spectra of TBQ.

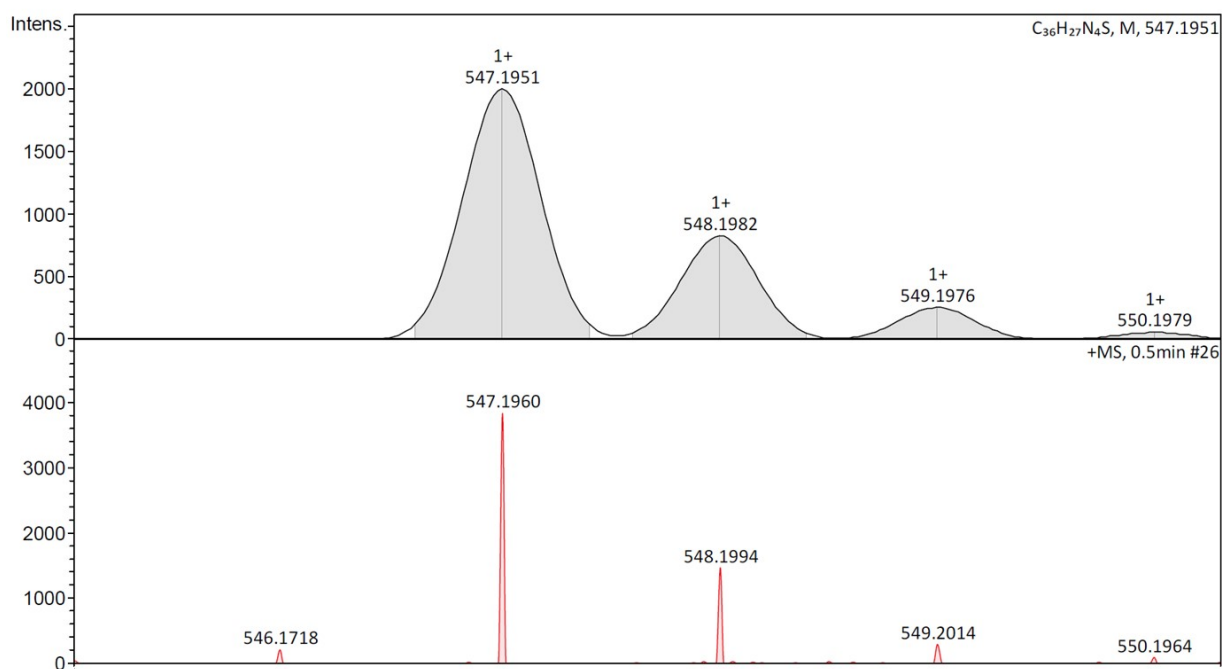

**Figure S10.** HRMS spectrum of TBQ.

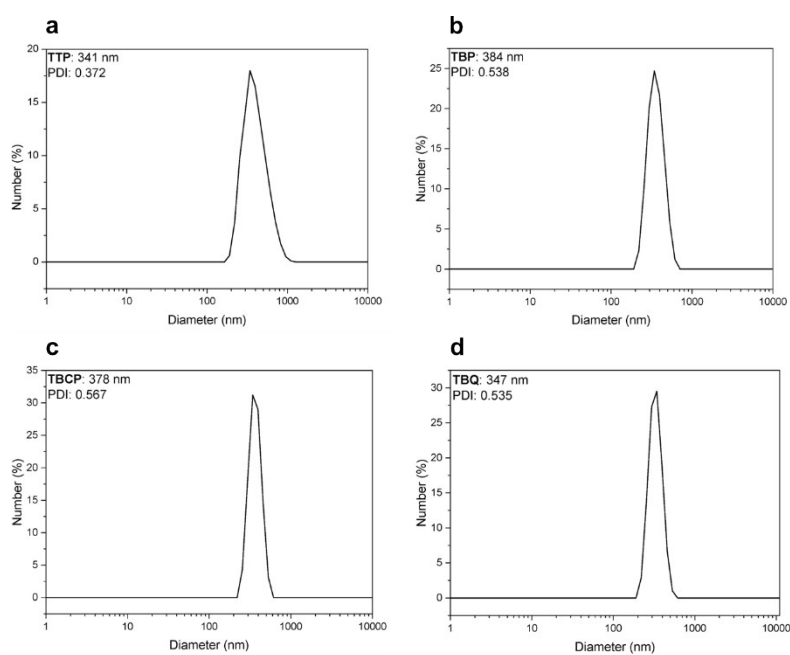

**Figure S11.** Size distributions of (a) TTP, (b) TBP, (c) TBQP, and (d) TBQ (10  $\mu$ M) in DMSO containing 95% toluene.

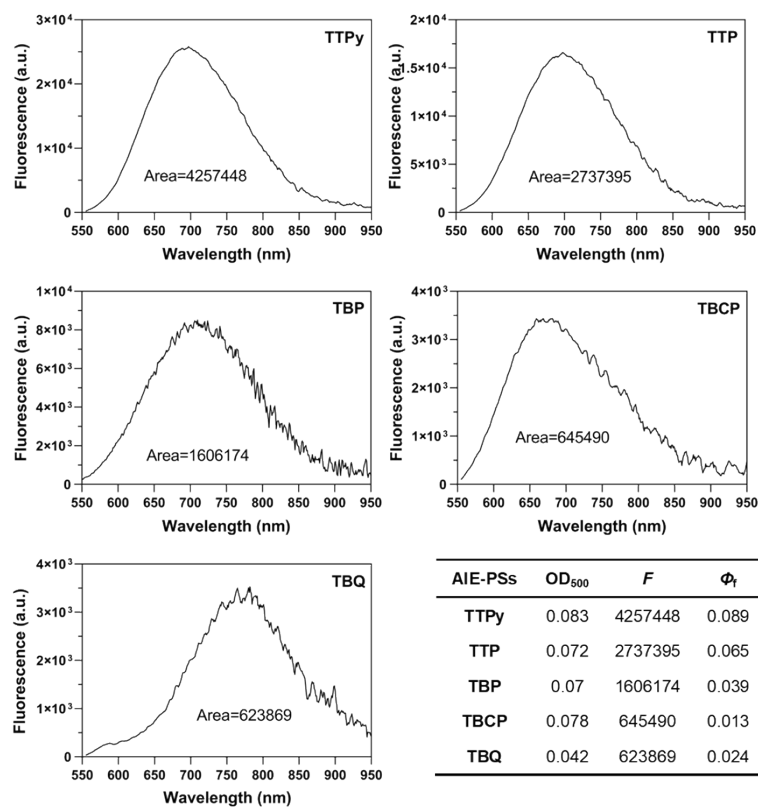

**Figure S12.** The measurement of fluorescence quantum yields ( $\Phi_f$ ) of AIE-PSs in DMSO containing 95% toluene ( $\lambda_{\text{ex}} = 500$  nm). *F* is the integrated fluorescence intensity under fluorescence emission spectrum.

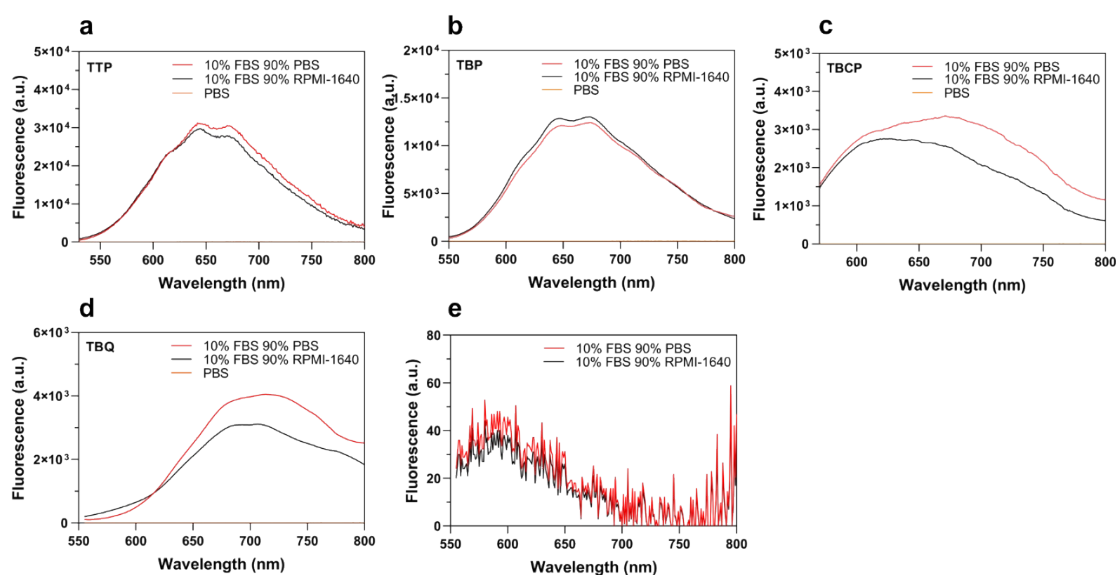

**Figure S13.** The photoluminescence spectra of (a) **TTP**, (b) **TBP**, (c) **TBCP**, and (d) **TBQ** (10  $\mu$ M) in 10% fetal bovine serum (FBS)/90% phosphate buffer saline (PBS), 10% FBS/90% PRMI-1640, or 100% PBS. (e) The photoluminescence spectra of background solvents containing 10% FBS/90% PBS, or 10% FBS/90% PRMI-1640.  $\lambda_{\text{ex}} = 500$  nm.

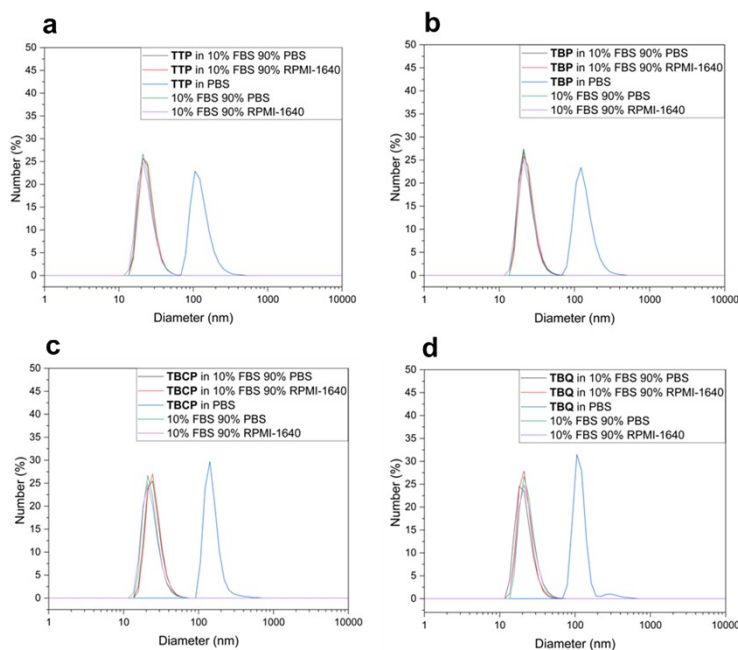

**Figure S14.** Size distributions of (a) **TTP**, (b) **TBP**, (c) **TBCP**, and (d) **TBQ** (10  $\mu$ M) in 10% FBS/90% PBS, 10% FBS/90% PRMI-1640, or 100% PBS.

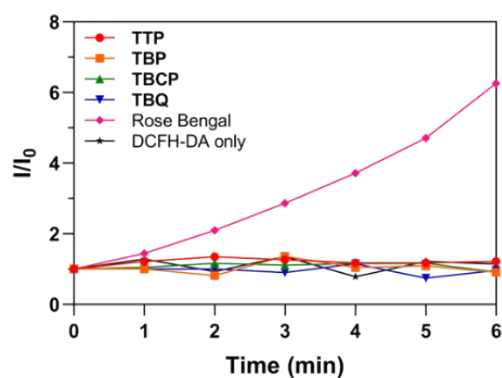

**Figure S15.** ROS generation abilities of AIE-PSs and Rose Bengal (10  $\mu\text{M}$  in water containing 50% methanol) under green light irradiation using DCFH-DA (100  $\mu\text{M}$ ) as an indicator.  $I_0$  and  $I$  are the fluorescence intensities of DCF at 520 nm, excited at 480 nm.

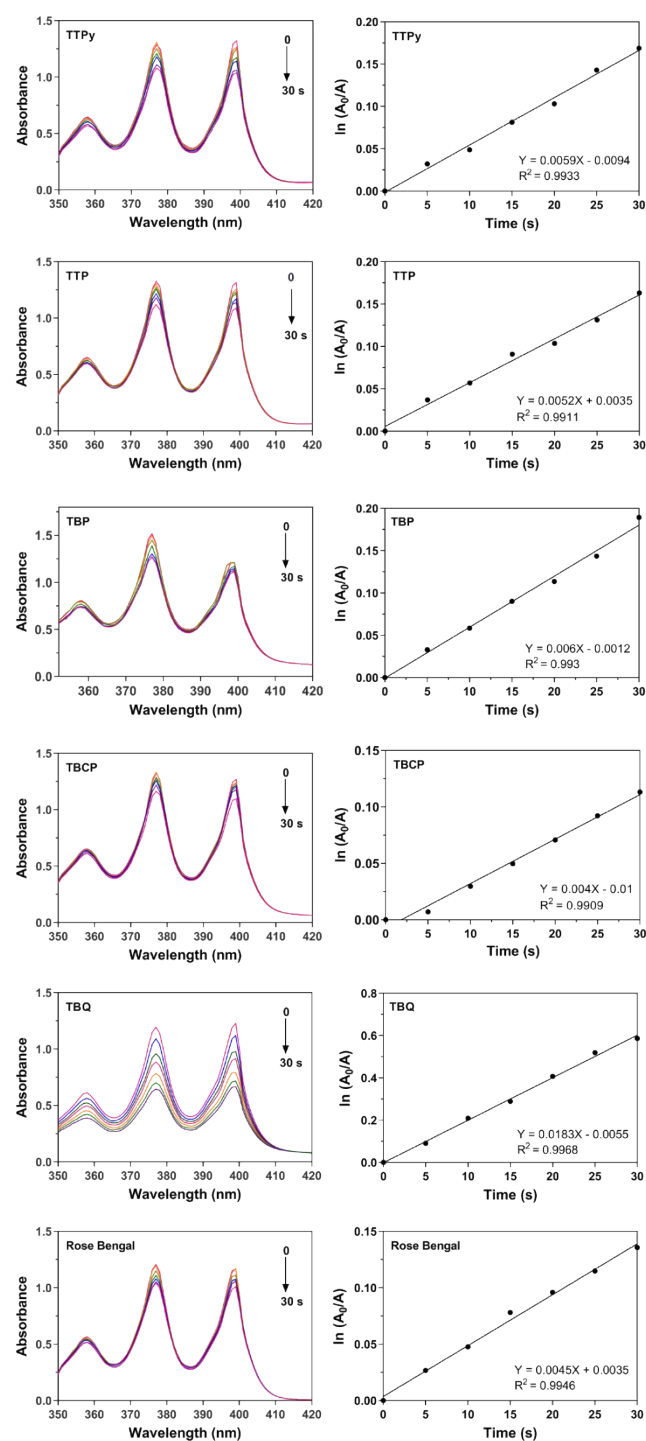

**Figure S16.** The measurement of singlet oxygen quantum yields ( $\Phi_{\Delta}$ ) of AIE-PSs in water containing 1% DMSO.  $K$  is the slope of the descent curve of ABDA absorbance decrease.

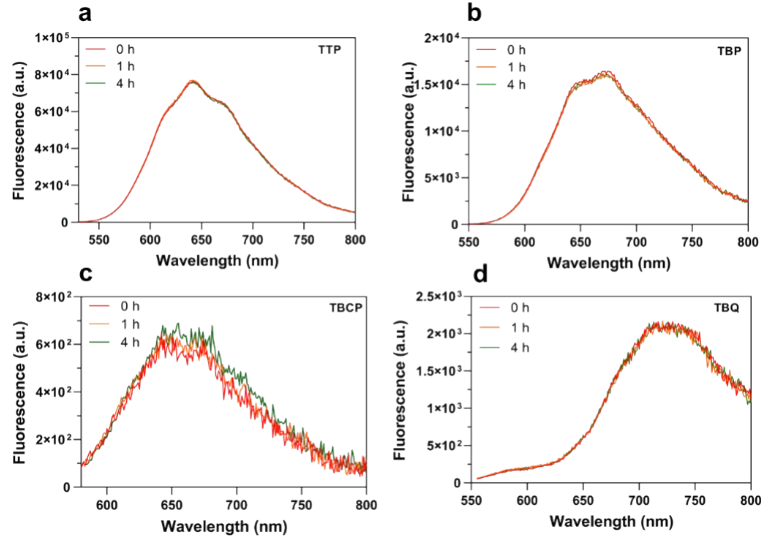

**Figure S17.** The stability of AIE-PSs (10  $\mu\text{M}$ ) in the lysate (water with 1% sodium dodecyl sulfate and 0.1 M NaOH) measured by tracking their fluorescence change at 0, 1, and 4 h after mixing. (a) TTP ( $\lambda_{\text{ex}} = 478$  nm), (b) TBP ( $\lambda_{\text{ex}} = 500$  nm), (c) TBCP ( $\lambda_{\text{ex}} = 540$  nm), and (d) TBQ ( $\lambda_{\text{ex}} = 525$  nm).

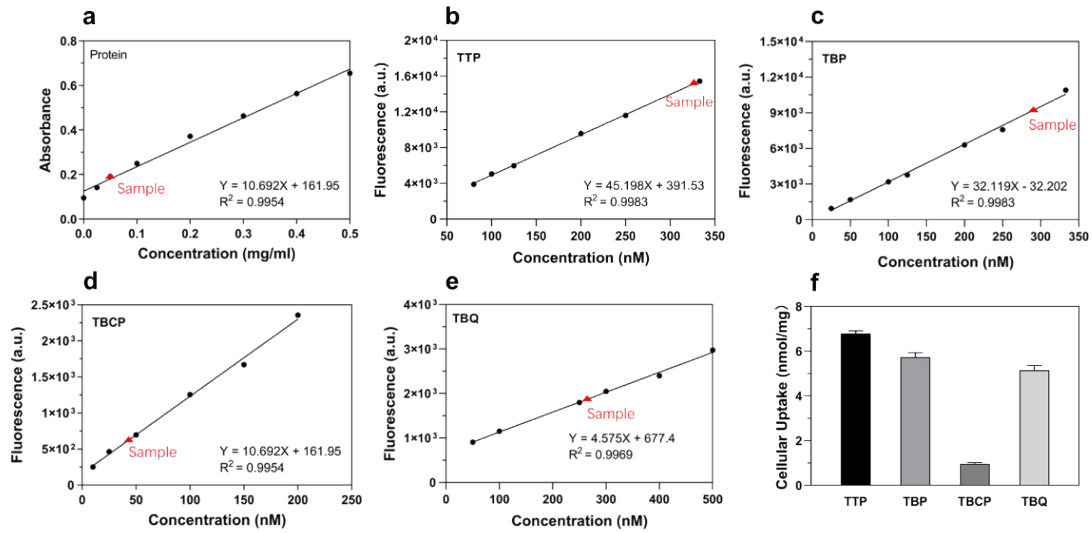

**Figure S18.** (a) The standard absorption curve of proteins ( $\lambda_{\text{abs}} = 562$  nm) detected using BCA protein assay kit. The standard fluorescence curves of (b) TTP ( $\lambda_{\text{ex}} = 478$  nm,  $\lambda_{\text{em}} = 650$  nm), (c) TBP ( $\lambda_{\text{ex}} = 500$  nm,  $\lambda_{\text{em}} = 670$  nm), (d) TBCP ( $\lambda_{\text{ex}} = 540$  nm,  $\lambda_{\text{em}} = 640$  nm), and (e) TBQ ( $\lambda_{\text{ex}} = 525$  nm,  $\lambda_{\text{em}} = 720$  nm) in the lysate (water with 1% sodium dodecyl sulfate and 0.1 M of NaOH). (f) The calculated cellular uptakes of TTP, TBP, TBQ, and TBCP,  $n = 3$ .
